# Supplementary material for: The long noncoding RNA Meg3 regulates myoblast plasticity and muscle regeneration through epithelial-mesenchymal transition
Source: Oxford University Press journal article supplement (doi:10.1242/dev.194027), 2020-01-01
Supplement: dev194027supp.pdf [file dev194027supp.pdf]

## Supplemental Figure 1

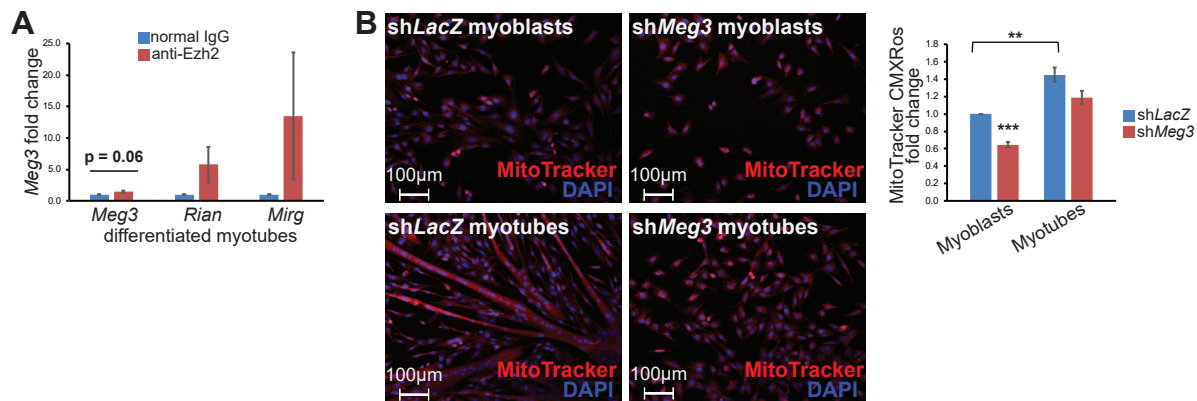

**Figure S1: *Meg3* is not significantly immunoprecipitated with Ezh2 in day3**

**myotubes, and sh*Meg3* myoblasts display reduced mitochondrial mass. A)** RNA-IP conducted in differentiated C2C12 myotubes revealed that Ezh2-dependent *Meg3* enrichment is downregulated upon myogenic differentiation (n=3 sets of 10 pooled plates). **B)** C2C12 myoblasts and myotubes were pulsed with MitoTracker CMXRos for 40 minutes, and co-stained with  $\alpha$ -actinin. Quantification of Mitotracker (restricted to  $\alpha$ -actinin+ cells) indicated reduced mitochondrial signal in sh*Meg3* myoblasts, but not myotubes (n=3). Both treatment groups displayed increased MitoTracker signal with differentiation.

## Supplemental Figure 2

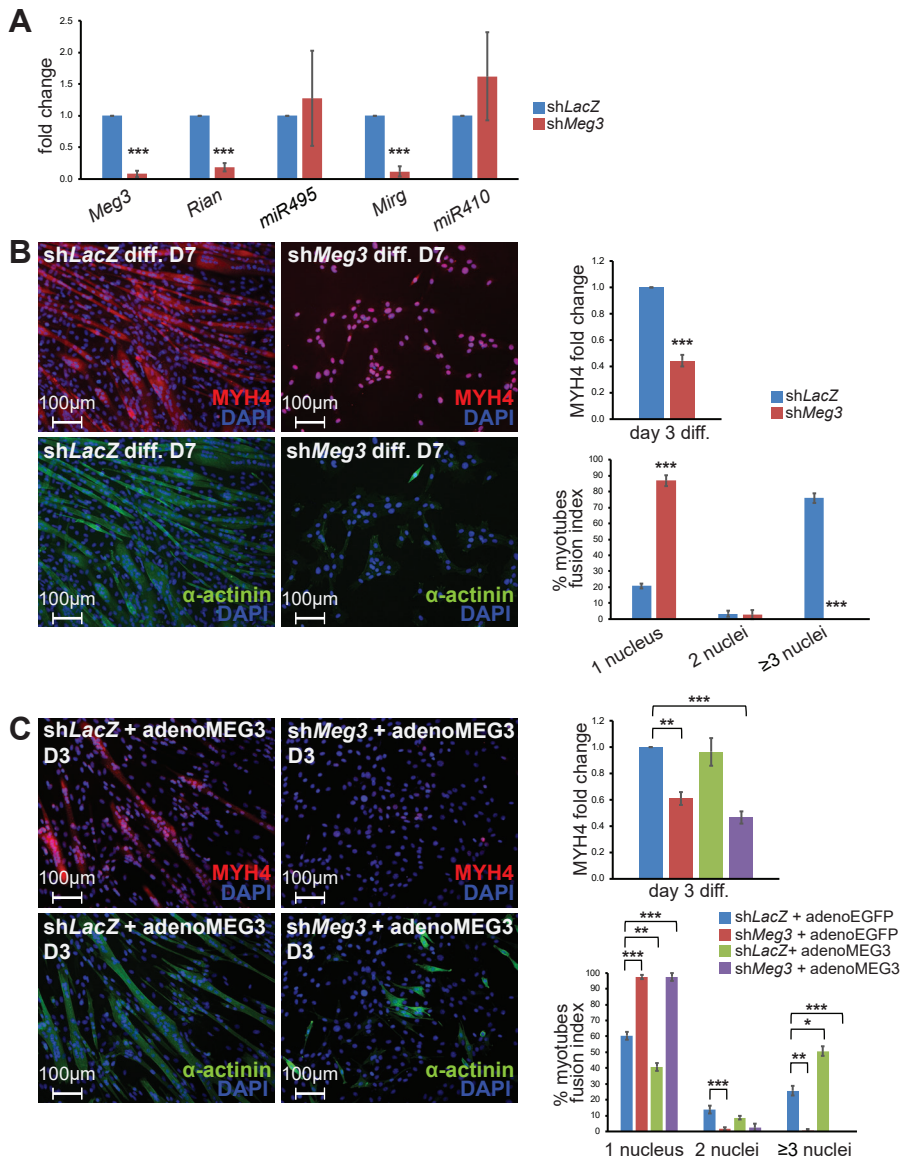

**Figure S2: *shMeg3* knockdown phenotype persists with extended differentiation and transient MEG3 overexpression.** **A)** Expression profiling of *Dkl1-Dio3* ncRNAs revealed significant downregulation of lncRNAs, but not miRNAs (n=3). **B)** Immunofluorescent analysis of shRNA clones on day 7 differentiation revealed persistence of MYH4 and fusion defects in *shMeg3* C2C12 myotubes. **C)** Transient overexpression of human MEG3 via adenoviral transduction (MOI 60) revealed that the *shMeg3* phenotype was indifferent to transient overexpression (n=3).

## Supplemental Figure 3

| Gene name symbol | Gene Name                                                      | C2C12       |             | TA          |             |
|------------------|----------------------------------------------------------------|-------------|-------------|-------------|-------------|
|                  |                                                                | Fold Change | p-value     | Fold Change | p-value     |
| Mymk             | myomaker, myoblast fusion factor                               | -1.7        | 0.20        | 1.2         | 0.30        |
| Mymx             | myomixer, myoblast fusion factor                               | -1.8        | 0.22        | 1.2         | 0.41        |
| Dysf             | dysferlin                                                      | -1.9        | 0.13        | -1.3        | 0.06        |
| <b>Myof</b>      | <b>myoferlin</b>                                               | -1.4        | 0.08        | <b>7.5</b>  | <b>0.00</b> |
| <b>Kirrel</b>    | <b>kirre like nephrin family adhesion molecule 1</b>           | <b>3.5</b>  | <b>0.00</b> | <b>2.3</b>  | <b>0.00</b> |
| Kirrel3          | kirre like nephrin family adhesion molecule 3                  | -1.1        | 0.73        | -1.5        | 0.29        |
| Kirrel3os        | kirre like nephrin family adhesion molecule 3, opposite strand | -1.1        | 0.91        | -1.1        | 0.82        |
| Jaml             | junction adhesion molecule like                                | -1.2        | 0.76        | 1.5         | 0.12        |
| <b>Jam2</b>      | <b>junction adhesion molecule 2</b>                            | <b>-3.5</b> | <b>0.00</b> | <b>-1.5</b> | <b>0.01</b> |
| Jam3             | junction adhesion molecule 3                                   | -1.5        | 0.09        | -1.2        | 0.26        |
| <b>Fer15</b>     | <b>fer-1-like 5 (C. elegans)</b>                               | <b>4.8</b>  | <b>0.01</b> | 1.3         | 0.56        |
| Ehd1             | EH-domain containing 1                                         | 1.3         | 0.39        | -1.1        | 0.37        |
| <b>Ehd2</b>      | <b>EH-domain containing 2</b>                                  | <b>2.0</b>  | <b>0.01</b> | -1.3        | 0.14        |
| Ehd4             | EH-domain containing 4                                         | -1.3        | 0.39        | 1.2         | 0.20        |

Figure S3: Myogenic fusion transcripts are not downregulated in *shMeg3*

**myotubes.** RNAseq data indicated that transcripts of master regulators of myogenic fusion, notably *Myomaker* and *Myomixer*, were not significantly downregulated in *shMeg3* myotubes.

## Supplemental Figure 4

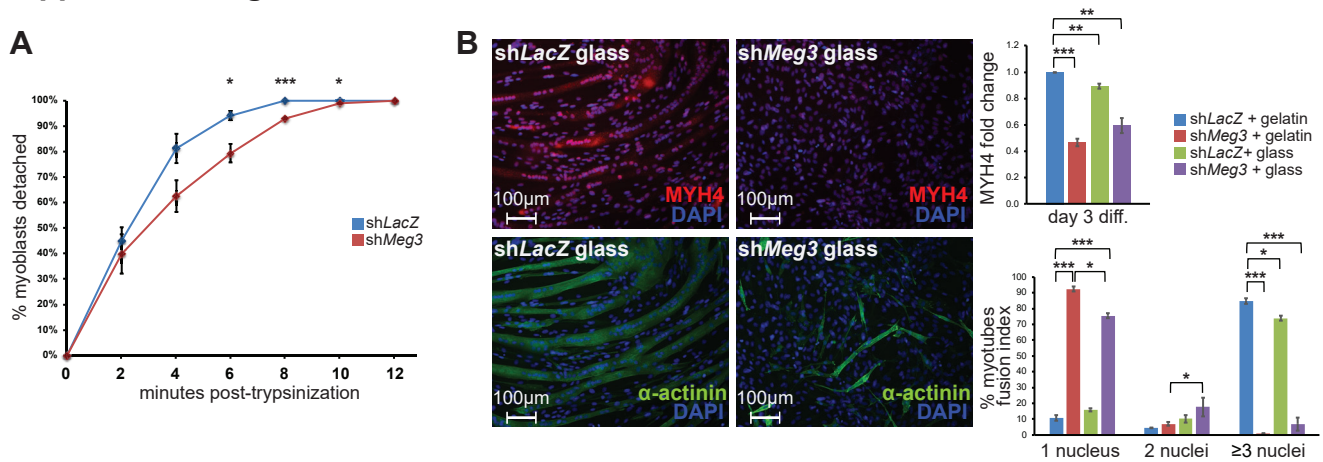**Figure S4: shMeg3 myoblasts require longer trypsinization, and depriving cells**

**of surface substrate had modest effects on fusion.** **A)** Quantification of cells recovered over time during trypsinization revealed that shMeg3 myoblasts require significantly more time to trypsinize to completion (n=3). **B)** When differentiated upon a substrate-deprived surface (glass), shMeg3 myoblasts had no change on MYH4 expression (n=3) or fusion of cells with  $\geq 3$  nuclei, but did exhibit reduced quantities of myotubes with 1- and 2- nuclei relative to shMeg3 controls differentiated on 0.1% gelatin (n=3). Differentiation atop glass also significantly reduced shLacZ MYH4 signal (n=3) and quantity of myotubes with  $\geq 3$  nuclei.

## Supplemental Figure 5

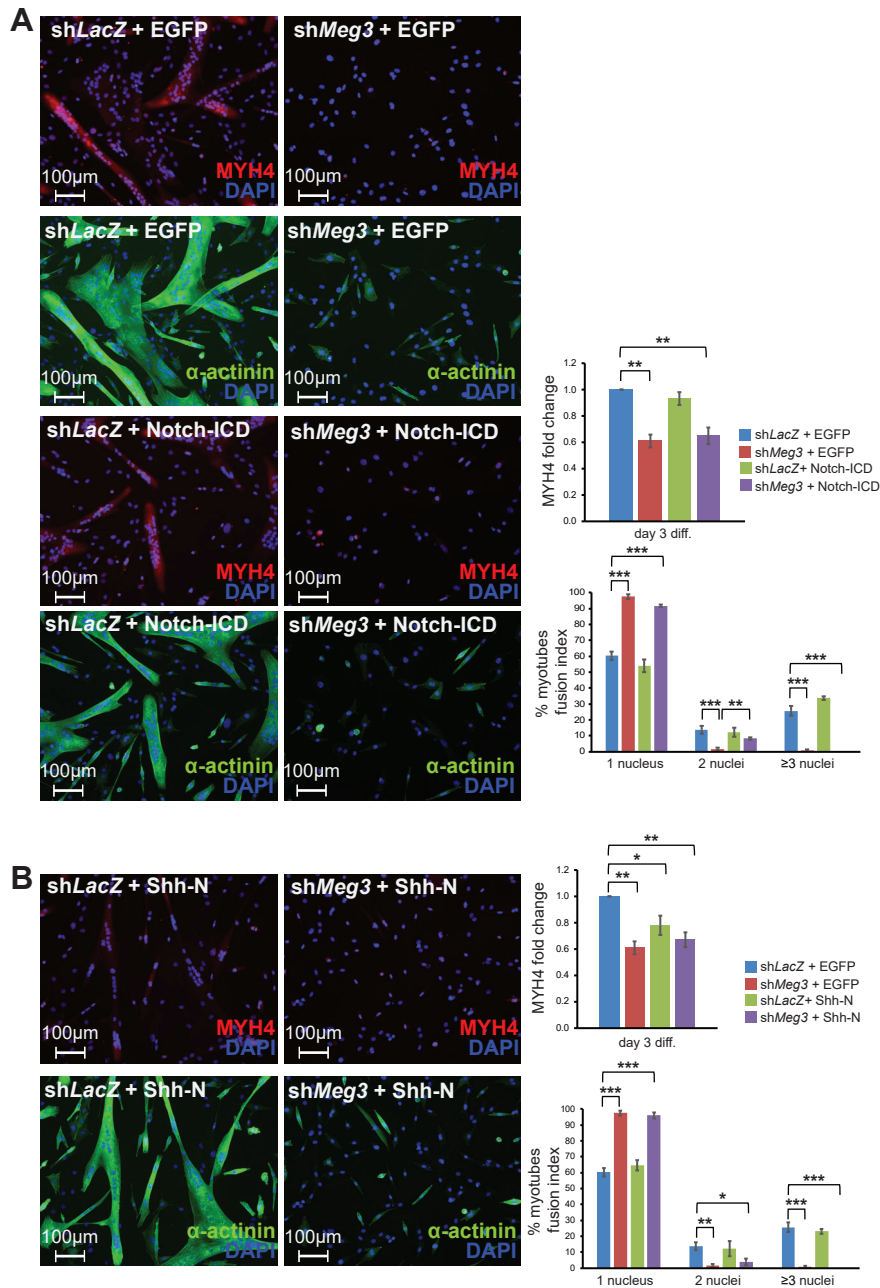

## Supplemental Figure 6

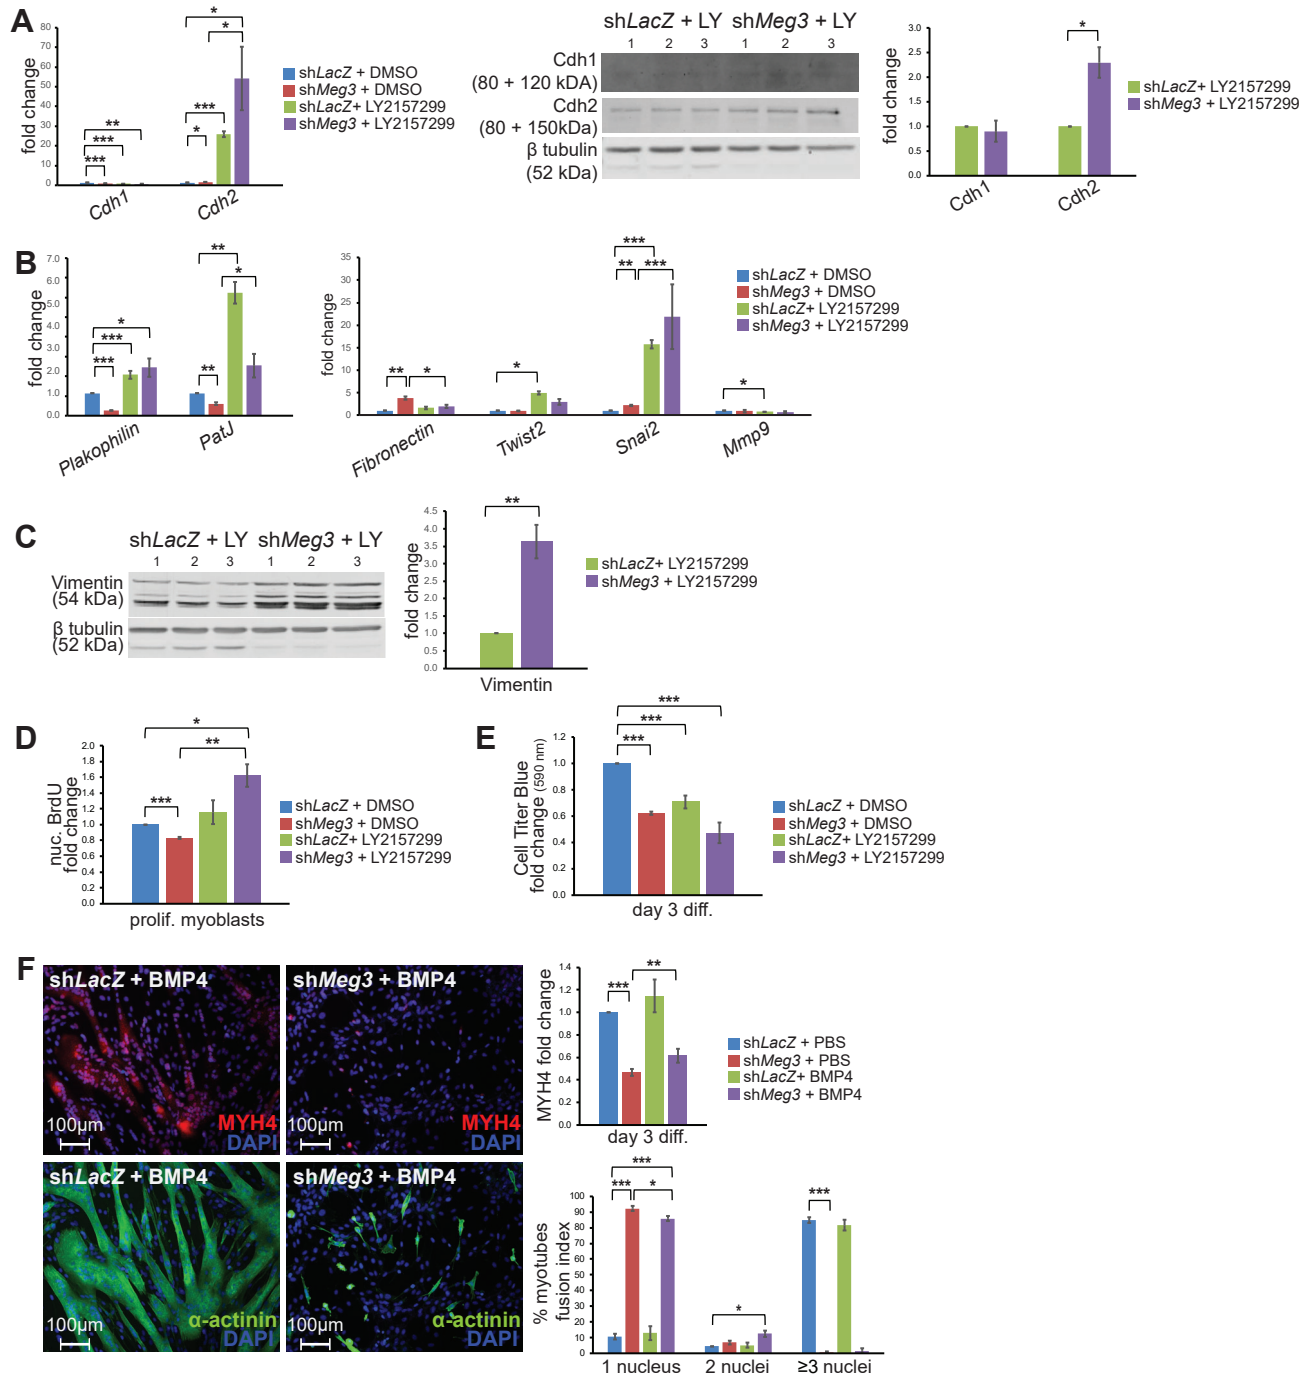

**Figure U6: TGF $\beta$ R1 inhibition results in dynamic EMT marker expression, and BMP4 stimulation is not sufficient for sh*Meg3* rescue.** **A)** qPCR indicated that LY2157299 (LY) treatment resulted in reduced *E-cadherin* (*Cdh1*) transcripts regardless of shRNA treatment, with simultaneous upregulation of *N-cadherin* (*Cdh2*) transcripts (n=3). Western blot revealed modest *Cdh1* band detection, and quantification of  $\beta$ -tubulin-normalized signal revealed that LY-treatment enhanced *Cdh2* signal in sh*Meg3* myotubes (n=3). **B)** qPCR profiling indicated upregulation of epithelial transcripts *Plakophilin* and *PatJ* regardless of shRNA background (n=3). *Fibronectin* transcript levels returned to normal levels in LY-treated sh*Meg3* myotubes. LY treatment intensified upregulation of *Snai2* transcripts in sh*Meg3* cells, but did not affect *Twist2* or *Mmp9* levels relative to sh*Meg3* myotubes. sh*LacZ* + LY myotubes displayed reduced *Mmp9*, with simultaneous upregulation of *Twist2* when compared to untreated sh*LacZ* cells (n=3). **C)** Western blot quantification of Vimentin suggests that LY treatment enhanced Vimentin expression in sh*Meg3* myotubes relative to LY-treated sh*LacZ* controls (n=3). **D)** Myoblasts pre-treated with 5ng/mL BMP4 (BMP) were subjected to differentiation, and examined for changes in MYH4 expression and fusion index. BMP4 treated sh*Meg3* myotubes had improved MYH4 expression (n=3), reduced mononucleated myotubes, and improved 2-cell fusion, but not  $\geq 3$  nuclei fusion.

## Supplemental Figure 7

**A**

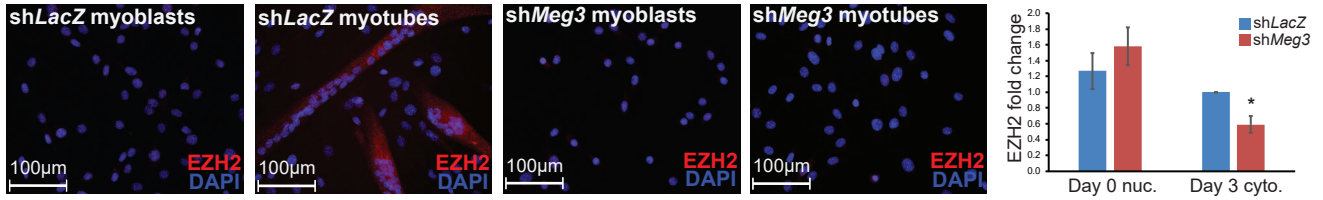

**B**

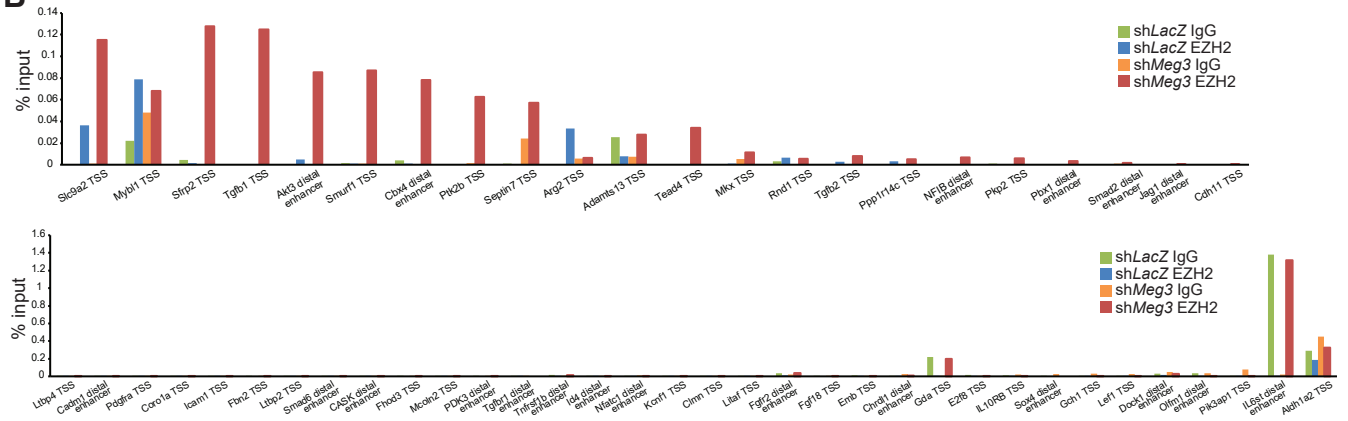

**C**

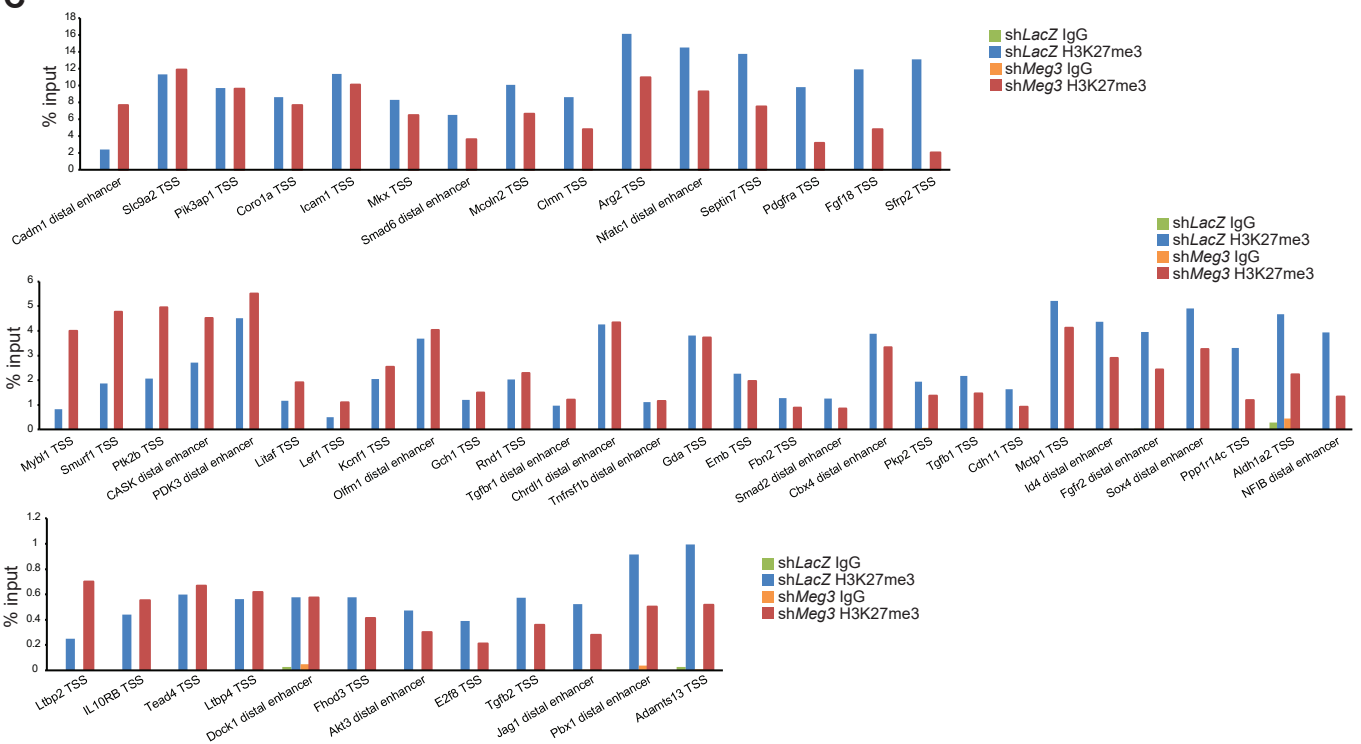



**Figure S7: Ezh2 activity is dysregulated in shMeg3 C2C12 myoblasts. A)**

Immunofluorescent analyses of Ezh2 in proliferating myoblasts and day 3 differentiation myotubes indicated cytoplasmic export of Ezh2 with myogenic differentiation; note that these cells were co-stained for H3K27me3, and correspond with images shown in Fig. 9B (n=3). **B)** ChIP-qPCR of Ezh2 immunoprecipitates revealed that Ezh2 immunoprecipitation was only above mock for a subset of loci surveyed, and predominantly enriched in shMeg3 samples (n=1 set of 30 pooled plates) **C)** ChIP-qPCR of H3K27me3 immunoprecipitates revealed dynamic changes in H3K27me3 enrichment for 57 loci (n=1 set of 30 pooled plates).

## Supplemental Figure 8

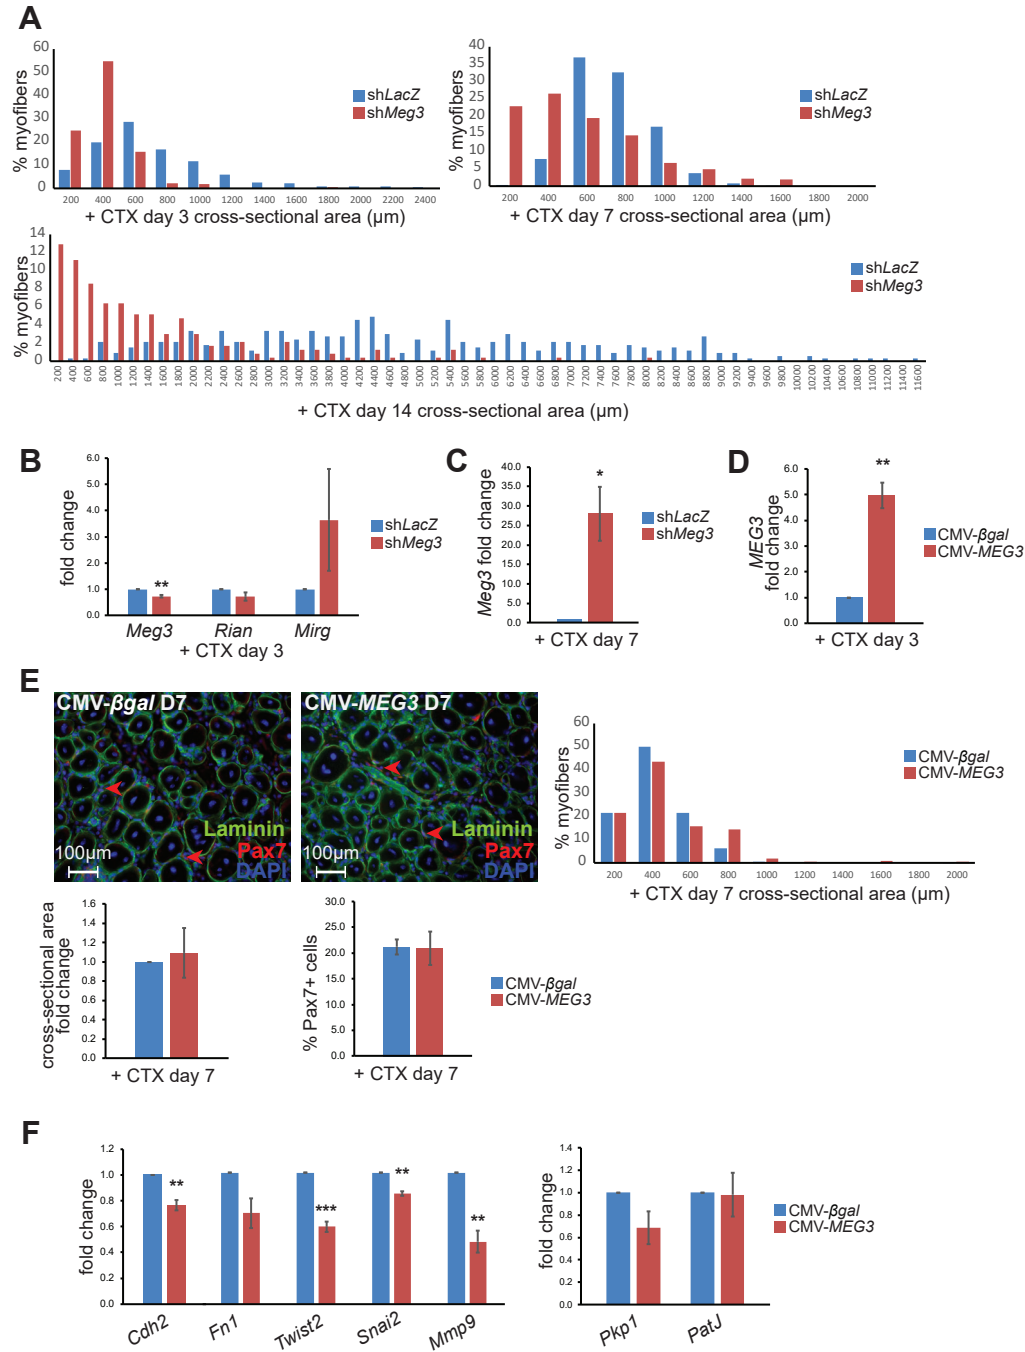

**Figure S8: Size and distribution of myofibers, expression profiling, and MEG3**

**overexpression in TA + CTX muscle. A)** Size and distribution of myofibers corroborated cross-sectional area findings shown in Figure 10, with *shMeg3* muscle harboring increased proportions of small myofibers. **B)** qPCR analysis of *Dlk1-Dio3* lncRNAs suggests adenoviral *shMeg3* specifically targeted *Meg3*, without affecting other lncRNAs derived from the polycistron at day 3 post-injury (n=3). **C)** At day 7 post-injury, endogenous *Meg3* levels are elevated in *shMeg3* relative to *shLacZ* controls (n=3). **D)** Ectopic MEG3 expression was observed in CTX-injured muscle co-treated with CMV-MEG3 adenovirus (n=3). **E)** MEG3 overexpression did not change day 7 + CTX size & distribution of myofibers (right panel), cross-sectional area (bottom left panel), or Pax7+ cell abundance (bottom right panel) (n=3). **F)** qPCR analysis suggests that *MEG3* overexpression was sufficient to downregulate several mesenchymal marker transcripts in day 7 CTX-injured muscle (n=3).

**Table S1: qPCR expression profiling primers.**

| Gene name          | Forward                   | Reverse                       |
|--------------------|---------------------------|-------------------------------|
| <i>I8S</i>         | CATTCGAACGTCTGCCCTAT      | CCTCCAATGGATCCTCGTTA          |
| <i>Gtl2</i>        | GACTTCACGCACAACACGTT      | TTACAGTTGGAGGGTCCTGG          |
| <i>Myf5</i>        | CCTGTCTGGTCCCGAAAGAAC     | GACGTGATCCGATCCACAATG         |
| <i>MyoD</i>        | CCACTCCGGGACATAGACTTG     | AAAAGCGCAGGTCTGGTGAG          |
| <i>Mef2C</i>       | GTGGTTTCCGTAGCAACTCCTAC   | GGCAGTGTGAAGCCAGACAGA         |
| <i>Myog</i>        | GAGACATCCCCCTATTTCTACC    | GCTCAGTCCGCTCATAGCC           |
| <i>Ckm</i>         | GGCTTCACTCTGGACGATGTCA    | CCTTGAAGACCGTGTAGGACTC        |
| <i>Acta1</i>       | ACCATCGGCAATGAGCGTTTCC    | GCTGTTGTAGGTGGTCTCATGG        |
| <i>MEG3</i>        | TTGAGTAGAGACCCGCCCTC      | CTGTGCTTTGGAACCGCATC          |
| <i>Cdh1</i>        | TGCAGGTCTCCTCATGGCTTTG    | CTTCAAATCTCACTCTGCCCAGG       |
| <i>Cdh2</i>        | ACTTGAGAGCACATGCAGTGG     | CATACGTCCCAGGCTTTGATCC        |
| <i>Plakophilin</i> | TGAGTCACTCCAACCGAGGTTC    | CTTGAGGGTCCCATTGTAGATCGG      |
| <i>PatJ</i>        | AGTGTAGCAGACAGGGATCACAG   | CACACCGTTTCTGGCAGAGTT         |
| <i>Fibronectin</i> | AGCAAATCGTGCAGCCTCAATC    | CTCAGGCTTGCTCTCGCAGTTA        |
| <i>Twist2</i>      | AGCAAGAAATCGAGCGAAGATGG   | GATCTTGCTGAGCTTGTGAGAGG       |
| <i>Snai2</i>       | AACTACAGCGAACTGGACACAC    | GTAATAGGGCTGTATGCTCCCGAG      |
| <i>Mmp9</i>        | AGTGAGAGACTCTACACGGAGC    | CCTGGTCATAGTTGGCTGTGGT        |
| <i>Rian</i>        | TCTGAGGTCCATAGCAGAAGATGCC | CCTTTCCGTGCATGGAGATTTGTATCTTG |
| <i>Mirg</i>        | GGCAAGGTCTAGGATGGACA      | CGCCAAGCTTCTGAATACTCC         |

**Table S2: ChIP-qPCR primers for enhancer analysis.**

| ChIP qPCR target: TSS and distal enhancers in the mouse genome with homology to human loci interacting with <i>MEG3</i> and <i>Ezh2</i> reported by Mondal <i>et al.</i> 2015 |                           |                          |
|-------------------------------------------------------------------------------------------------------------------------------------------------------------------------------|---------------------------|--------------------------|
| Primer name                                                                                                                                                                   | Forward                   | Reverse                  |
| Jag1 distal enhancer                                                                                                                                                          | ACTCAGCAGAAATGCATCACAT    | AAGGAAAGACTTTTTGAAGAGGGT |
| Smad2 distal enhancer                                                                                                                                                         | CCCCTCTCAGCCCGATCAT       | GAACAGGTACTIONTGGGCAGCAC |
| Nfatc1 distal enhancer                                                                                                                                                        | CTTGGCATAGCAAAAGCAGATGA   | TTACGTGGTGTGCACTTTCGT    |
| Smad6 distal enhancer                                                                                                                                                         | CTGCGTGCACGTTAGAAACC      | CAAAGTGCCGTTAGCAACCC     |
| PDK3 distal enhancer                                                                                                                                                          | TGCTCCCTTCTCTGTCCTGT      | AACCTCCTCCAGGCTCAGAT     |
| CASK distal enhancer                                                                                                                                                          | GAGAGAGTCCTGCCCTGAAC      | GTCTTGGATCAGTTCCACTCCA   |
| Chrdl1 distal enhancer                                                                                                                                                        | CTGATTACATATTCATCACTCGGGC | GAGGTAGATGATGAAGGCAGGTT  |
| NFIB distal enhancer                                                                                                                                                          | GCTACTGACGAGCTGAACACA     | CACTTAGGCAATAGATGGCAGTG  |
| Tgfbr1 distal enhancer                                                                                                                                                        | GTGTGCTGACTCCTGCATTTT     | ACATTGCCGGTGACCGAAG      |
| Olfm1 distal enhancer                                                                                                                                                         | AGGGGGAAGCTAGAGACCTG      | GAAAGGAGCCTCAGGCCAAA     |
| Fgfr2 distal enhancer                                                                                                                                                         | ACTCTGCAGGAGGAGTCAGT      | TCTTCTCCTGGTCTGGCTCA     |
| Dock1 distal enhancer                                                                                                                                                         | CCAGATACCCTGCCAACAGAT     | TTGACTGCACTTCATGGGAGG    |
| IL6st distal enhancer                                                                                                                                                         | CCAAAAGCTTCTCCCTTCTCAG    | ACTACATGGGTTTGATCTGATCCT |
| Fgf18 TSS                                                                                                                                                                     | TGGAGTCCCACACATCACTC      | CTAGGAGCTACTGCTTGAGCC    |
| Clmn TSS                                                                                                                                                                      | CACGCTTGGTGGATACGGG       | AGATCAGCGACATCCGTGTG     |
| Smurf1 TSS                                                                                                                                                                    | TTACGGCCACGGGCT           | TGGTCTCCGGCCCAAC         |
| Tnfrsf1b distal enhancer                                                                                                                                                      | GTACTIONTTAGGTGCTGGGGGA   | TGACCAGCAGGTGGGATTTT     |
| Pbx1 distal enhancer                                                                                                                                                          | TGTGTGGTCAAGGGGAATCG      | ACTAGCGTTCAAGCTGCCAT     |
| Tgfb2 TSS                                                                                                                                                                     | TAGCACAACCACCGTTGAGAAA    | CCCTTTATGGCTCCTTGGGATT   |
| Akt3 distal enhancer                                                                                                                                                          | CACATAAGGCAGACTTGTAGGAGG  | CTGTATGGTGAGAAGCAGGGTATG |
| Id4 distal enhancer                                                                                                                                                           | TGCATTATGTATTATCCCAGAAGCC | TGCCTCTGTGATGCTCTGAC     |
| Sox4 distal enhancer                                                                                                                                                          | AGGCACAACCTGCACCTAATTT    | TTGGGCTTAACTGCTTTTTGGTT  |
| Cadm1 distal enhancer                                                                                                                                                         | GGGACGTGCTCATCAAAGGA      | CCTTCACTCGGCTGGACTT      |
| Cbx4 distal enhancer                                                                                                                                                          | TGAAGCATGTGACCATTTGTGG    | TCCCCACTCTCACTCACAGA     |
| Litaf TSS                                                                                                                                                                     | GATGGGGTGGGGTCTAGGAG      | TCAGGTCGTAGCTTCATCCCT    |

**Table S3: ChIP-qPCR primers for TSS analysis.**

ChIP qPCR target: transcription start sites harboring H3K27me3 identified in mouse satellite cells by Liu *et al.* 2013.

| Primer name  | Forward                | Reverse                   |
|--------------|------------------------|---------------------------|
| Adamts13 TSS | AGCAACCCCTCAAGGGTGAAG  | CTCTGCGTCTGTTGACTCCA      |
| Aldh1a2 TSS  | CACGTCCAATAAGAAGCGCC   | ATCTCGCTGGAAGTCATGGG      |
| Arg2 TSS     | GCTGTAGTCCTCCGAGAAGGT  | CTTCGATGCTTCACTAGGCGA     |
| Cdc3 TSS     | TCTGGACCCTTTTTAAGCGTGG | CACGGCTAGCTCTTCGGC        |
| Coro1a TSS   | CCCCAGGACCATTGAGGTTT   | CTATGAGGATGTGCGCGTCT      |
| Cdh11 TSS    | CGGAATTAGGGAGCGCATTCT  | TTCACCGATTTCCCCGCAA       |
| E2f8 TSS     | AAATCACCCGCGATGCCAAAG  | GGCTTACTGATTGGCTCGGA      |
| Embigin TSS  | AATTGCGCTGGGAGCGT      | CCCTGTGTACACTTGCTGGTA     |
| Fbn2 TSS     | AGAGCACTGTCCGAGACCAA   | CTACACCAGGACACCGCAAG      |
| Fhod3 TSS    | GGCGTTTCTGCGCGTTGATT   | GACAGGGAATGCGAGAGTCGT     |
| Gch1 TSS     | TAGCCTCAGCTACAGAGTACGG | AGAGATTGCTGGAGATCTAACTGAC |
| Gda TSS      | CCTCCTGGATGCCAATAGGATT | AACACATCCAAAACCAACGCA     |
| Icam1 TSS    | AGAGACTATAAAAGCGCCGCC  | ACGGGTTGAAGCCATTGCAG      |
| IL10RB TSS   | AGAAACAGAAGCGCGGATTG   | GGCGGCCTCAAGCTAAGT        |
| Kcnf1 TSS    | TCCAGAGCTTTAAGGCCAGC   | GACAGAAGGAGTGTGCCCAA      |
| Lef1 TSS     | CAACCCAAAGAAAGGGTGGTTT | CCATCGGGACAGAGAAGGTAAC    |
| Ltbp2 TSS    | GTAAGGGCTGTATGGCGTGA   | CCTTCGGTTCCCTTCAGAC       |
| Ltbp4 TSS    | GTCACGTTTCGGGCCAAGAT   | GACGTCGCGAGTGCTACTTT      |
| Mcoln2 TSS   | CTCCTGGAATATCTCCCGCC   | GCGCTGTCACGAAGGACT        |
| Mctp1 TSS    | AGTTCAGAGCTGCAAGTGCT   | AGACTTGGCTGTCTTCGCAA      |
| Mkx TSS      | CCGGAGTCGTCTCTGCTTTA   | GGGAACATGGATAACCGCGT      |
| Mybl1 TSS    | ACACCCACCGAACAGGAAAA   | GAAGGATGGCGAAGAGGTCG      |
| Pdgfra TSS   | GCTTACTGGGACGAACACCA   | GCGGGCGACGAATGAAAATA      |
| Pik3ap1 TSS  | AAGTGAGAAGTCCACACGACC  | TGGCTGCCTGCTTTCGG         |
| Pkp2 TSS     | AGTCCCTCCTGGTCACTCC    | GTCCAGGTGACCCAGGATCT      |
| Ppp1r14c TSS | GTCGACATATTTTCGTGCGCC  | GTCGTCCGAGGTGGAGAATC      |
| Ptk2b TSS    | TCCTTAAAGGGTGGGGTGTG   | GAATTGCAGGCGGCATCTAT      |
| Rnd1 TSS     | ACTAGCACACTAGCGCGG     | ATAGCGGAGCCTTACGAGC       |
| Sfrp2 TSS    | TCGAGTACCAGAACATGCGG   | GAACTTCTTGGTGTCCGGGT      |
| Slc9a2 TSS   | ACTGGGAGGCAGATGGTTTG   | GGAAAAGCGGGATTCTCCCA      |
| Tead4 TSS    | CGATTTCCCGCTCTCATCCAG  | GGAGGGGACGGTTTTTCGG       |
| Tgfb1 TSS    | CCCTCCCTCGGGCTACTAA    | ACCCACGATGAAAGCAGGC       |
